# Supplementary material for: Improving the Detection, Assessment, Management and Prevention of Delirium in Hospices (the DAMPen-D study): protocol for a co-design and feasibility study of a flexible and scalable implementation strategy to deliver guideline-adherent delirium care
Source: HighWire-hosted journal article supplement (doi:10.1136/bmjopen-2021-060450), 2022-07-01
Supplement: bmjopen-2021-060450supp001_data_supplement.pdf [file bmjopen-2021-060450supp001_data_supplement.pdf]

## Online supplemental file 1

'Improving the Detection, Assessment, Management, and Prevention of Delirium in Hospices (the DAMPen-D study): Protocol for a co-design and feasibility study of a flexible and scalable implementation strategy to deliver guideline-adherent delirium care.'

|                                        |                                                  |              |                                                               |
|----------------------------------------|--------------------------------------------------|--------------|---------------------------------------------------------------|
| <b>Case Number_Pre</b>                 | Non-identifiable ID number                       | N/A          | Alphanumeric                                                  |
| <b>Age_Pre</b>                         | Patient age                                      | Integer      | Years                                                         |
| <b>Sex_Pre</b>                         | Patient gender                                   | Categorical  | Male, female, other                                           |
| <b>Diagnosis_Pre</b>                   | Patient diagnosis                                | String       | Cancer etc.                                                   |
| <b>Ethnicity_pre</b>                   | Patient ethnicity                                | Categorical  | Black, white etc.                                             |
| <b>IMD score_Pre</b>                   | Postcode converted                               | Float        |                                                               |
| <b>Adm_Ac_conf_state_Pre</b>           | Evidence of acute confusional state on admission | Binary       | Yes/No                                                        |
| <b>Adm_screen_Pre</b>                  | Patient screened for delirium on admission       | Binary       | Yes/No                                                        |
| <b>Adm_Screen_by_Pre</b>               | If screened, who completed screening             | Categorical  | Doctor, Nurse practitioner, Registered Nurse, Other (specify) |
| <b>Adm_screen_type_Pre</b>             | If screened, name of screening tool              | Alphanumeric | 4AT etc.                                                      |
| <b>Adm_screen_result_Pre</b>           | If screened, result                              | Binary       | Positive/Negative                                             |
| <b>Adm_no_screen_just-Pre</b>          | Was justification given for not screening        | Binary       | Yes/No                                                        |
| <b>Adm_no-screen_just-verbatim-Pre</b> | Was justification given for not screening        | String       | Verbatim text                                                 |

## Online supplemental file 1

'Improving the Detection, Assessment, Management, and Prevention of Delirium in Hospices (the DAMPen-D study): Protocol for a co-design and feasibility study of a flexible and scalable implementation strategy to deliver guideline-adherent delirium care.'

|                                        |                                                                       |         |                   |
|----------------------------------------|-----------------------------------------------------------------------|---------|-------------------|
| <b>Adm_risk-ass-Pre</b>                | If screening negative or not done was risk assessment carried out?    | Binary  | Yes/No            |
| <b>Adm-risk-ass_result_Pre</b>         | If risk assessment carried completed results                          | Binary  | Positive/Negative |
| <b>Adm_prev_meas_Pre</b>               | If risk assessment positive were preventive measures put in place     | Binary  | Yes/No            |
| <b>Adm_Judge_rationale_pre</b>         | If researcher judgement was required for any of above, give rationale | String  | Free text         |
| <b>Dur_adm_Ac_conf_state_pre</b>       | Evidence of acute confusional state during admission                  | Binary  | Yes/No            |
| <b>Dur_adm_Multi_ep_cog_dys_Pre</b>    | Multiple episodes of cognitive dysfunction during admission           | Binary  | Yes/No            |
| <b>Dur_adm_Multi_ep_cog_dys_no_Pre</b> | Multiple episodes of cognitive dysfunction during admission           | Integer | 1,2,3             |

## Online supplemental file 1

'Improving the Detection, Assessment, Management, and Prevention of Delirium in Hospices (the DAMPen-D study): Protocol for a co-design and feasibility study of a flexible and scalable implementation strategy to deliver guideline-adherent delirium care.'

|                                         |                                                                       |              |                                                               |
|-----------------------------------------|-----------------------------------------------------------------------|--------------|---------------------------------------------------------------|
| <b>Dur_adm_screen_Pre</b>               | If patient had multiple episodes was the patient screened             | Binary       | Yes/No                                                        |
| <b>Dur_adm_screen_type_Pre</b>          | If screened, name of tool                                             | Alphanumeric | 4AT etc.                                                      |
| <b>Dur_Adm_Screen_result_Pre</b>        | Result of screening during admission                                  | Binary       | Positive/negative                                             |
| <b>Dur_adm_Sceen_by_Pre</b>             | Who completed screening during admission                              | Categorical  | Doctor, Nurse practitioner, Registered Nurse, Other (specify) |
| <b>Dur_adm_Judge_rationale_Pre</b>      | If researcher judgement was required for any of above, give rationale | String       | Verbatim text                                                 |
| <b>Case_rec_ac_conf_reported_by_Pre</b> | Who reported the first episode of acute confusion in the case record  | Categorical  | Doctor, Nurse practitioner, Registered Nurse, Other (specify) |
| <b>Case_rec_date_first_ep_Pre</b>       | Date of first episode of acute confusion in the case record           | Date         | 10.10.2021                                                    |
| <b>Case_rec_time_first_ep_Pre</b>       | Time of first episode of acute confusion in case record               | Time         | 24hr format                                                   |

## Online supplemental file 1

'Improving the Detection, Assessment, Management, and Prevention of Delirium in Hospices (the DAMPen-D study): Protocol for a co-design and feasibility study of a flexible and scalable implementation strategy to deliver guideline-adherent delirium care.'

|                                          |                                                                                                  |             |                            |
|------------------------------------------|--------------------------------------------------------------------------------------------------|-------------|----------------------------|
| <b>Case_rec_verbatim_ref_ac_conf_Pre</b> | Describe each reference to acute confusion in the case record                                    | String      | Verbatim text              |
| <b>Case_rec_ac_conf_tot_days_Pre</b>     | Total duration of acute confusion in days as determined by all the references in the case record | Integer     | 5 (days) or 0 days if none |
| <b>Case_rec_Improve_revers_Pre</b>       | Any evidence of improvement or reversibility of acute confusion during the stay                  | Categorical | Yes/No/Unsure              |
| <b>Case_rec_ev_descr_pre</b>             | Describe evidence of reversibility                                                               | String      | Free text                  |
| <b>Case_rec_Del_present_Pre</b>          | Delirium present                                                                                 | Categorical | Yes/No                     |
| <b>Case_rec_subtype_Pre</b>              | If delirium present what subtype                                                                 | Categorical | Hypo/Hyper/Mixed           |
| <b>Case_rec_del_med_ass_Pre</b>          | Medical assessment (DSM-V delirium assessment) to assess for delirium                            | Binary      | Yes/No                     |
| <b>Case_rec_diag_doc_Pre</b>             | Diagnosis of delirium recorded                                                                   | Categorical | Yes/No                     |

## Online supplemental file 1

'Improving the Detection, Assessment, Management, and Prevention of Delirium in Hospices (the DAMPen-D study): Protocol for a co-design and feasibility study of a flexible and scalable implementation strategy to deliver guideline-adherent delirium care.'

|                                     |                                                                       |             |                                                                                |
|-------------------------------------|-----------------------------------------------------------------------|-------------|--------------------------------------------------------------------------------|
| <b>Case_rec_judge_rationale_Pre</b> | If researcher judgement was required for any of above, give rationale | String      | Free text                                                                      |
| <b>Invest_del_ass_rev_cause_Pre</b> | Assessment for reversible causes of delirium                          | Binary      | Yes/No                                                                         |
| <b>Invest_med_rev_Pre</b>           | Was a medication review conducted                                     | Binary      | Yes/No                                                                         |
| <b>Invest_rev_cause_treat_Pre</b>   | Was a treatment instigated for a reversible cause of delirium         | Binary      | Yes/No                                                                         |
| <b>Invest_judge_rationale_Pre</b>   | If researcher judgement was required for any of above, give rationale | String      | Free text                                                                      |
| <b>Del_care_plan_Pre</b>            | Delirium care plan documented                                         | Binary      | Yes/no                                                                         |
| <b>Del_sev_Pre</b>                  | Was delirium severity assessed                                        | Categorical | RASS-PAL + hallucination, RASS-PAL only, hallucination only, other specify, No |

## Online supplemental file 1

'Improving the Detection, Assessment, Management, and Prevention of Delirium in Hospices (the DAMPen-D study): Protocol for a co-design and feasibility study of a flexible and scalable implementation strategy to deliver guideline-adherent delirium care.'

|                                      |                                                                                                                 |             |                                                                               |
|--------------------------------------|-----------------------------------------------------------------------------------------------------------------|-------------|-------------------------------------------------------------------------------|
| <b>Harm_distress_behaviour_Pre</b>   | Did patient display behaviours harmful or distressing to self or others                                         | Binary      | Yes/No                                                                        |
| <b>Sedative_admin_during_del_Pre</b> | Was sedative administered during period of delirium                                                             | Binary      | Yes/No                                                                        |
| <b>Sedative_med_type</b>             | Sedative medication type                                                                                        | String      | Name of medication                                                            |
| <b>Sed_ind_Pre</b>                   | Sedative medication administered for                                                                            | Categorical | Delirium, anxiety, breathlessness, nausea, terminal agitation, other, unclear |
| <b>Del_risk_discuss_patient_fam</b>  | Was delirium risk and prevention discussed with patients and families of patients without delirium on admission | Categorical | Yes/No/unable                                                                 |
| <b>Del_ep_discuss_patient_Pre</b>    | Was episode of delirium discussed with the patient                                                              | Categorical | Yes/No/Unable                                                                 |

## Online supplemental file 1

'Improving the Detection, Assessment, Management, and Prevention of Delirium in Hospices (the DAMPen-D study): Protocol for a co-design and feasibility study of a flexible and scalable implementation strategy to deliver guideline-adherent delirium care.'

|                                          |                                                                          |             |               |
|------------------------------------------|--------------------------------------------------------------------------|-------------|---------------|
| <b>Del_ep_discuss_patient_family_Pre</b> | Was episode of delirium discussed with the patient's family              | Categorical | Yes/No/Unable |
| <b>Del_info_Pre</b>                      | Was any written information about delirium provided to patient or family | Categorical | Yes/No/Unable |
